# Supplementary material for: Bicycling to Work and Primordial Prevention of Cardiovascular Risk: A Cohort Study Among Swedish Men and Women
Source: PubMed Central journal article supplement — J Am Heart Assoc. 2016 Oct 31;5(11):e004413. doi: 10.1161/JAHA.116.004413 (PMC5210355; doi:10.1161/jaha.116.004413), 2016-10-31
Supplement: JAH3-5-e004413-s001.pdf [file JAH3-5-e004413-s001.pdf]

## SUPPLEMENTAL MATERIAL

**Table S1.** Commuting mode to work at baseline and cardiovascular risk factor levels at follow-up.

|                                        | Commuting mode to work at baseline |                          |                    |                     |
|----------------------------------------|------------------------------------|--------------------------|--------------------|---------------------|
|                                        | Passive (reference)                | Irregular traveling mode | Walking            | Bicycling           |
| <b>Risk factor levels at follow-up</b> |                                    |                          |                    |                     |
| BMI (kg/m <sup>2</sup> )               |                                    |                          |                    |                     |
| Basic model                            | -                                  | -0.14 (-0.27;-0.02)      | 0.02 (-0.08;0.12)  | -0.21 (-0.28;-0.13) |
| Fully adjusted model                   | -                                  | -0.13 (-0.26;-0.01)      | 0.01 (-0.09;0.11)  | -0.17 (-0.24;-0.19) |
| Systolic blood pressure (mmHg)         |                                    |                          |                    |                     |
| Basic model                            | -                                  | -0.72 (-1.58;0.14)       | -0.10 (-0.77;0.57) | -1.21 (-1.70;-0.71) |
| Fully adjusted model                   | -                                  | -0.49 (-1.36;0.37)       | -0.01 (-0.69;0.66) | -0.87 (-1.37;-0.36) |
| Diastolic blood pressure (mmHg)        |                                    |                          |                    |                     |
| Basic model                            | -                                  | -0.35 (-0.88;0.17)       | -0.32 (-0.73;0.09) | -0.90 (-1.02;-0.59) |
| Fully adjusted model                   | -                                  | -0.25 (-0.78;0.27)       | -0.22 (-0.63;0.19) | -0.72 (-1.03;-0.42) |
| Triglycerides (mmol/l)                 |                                    |                          |                    |                     |
| Basic model                            | -                                  | 0.01 (-0.03;0.05)        | -0.01 (-0.04;0.02) | -0.05 (-0.07;-0.03) |
| Fully adjusted model                   | -                                  | 0.02 (-0.02;0.06)        | -0.01 (-0.04;0.02) | -0.04 (-0.06;-0.01) |
| 2-hour glucose (mmol/l)                |                                    |                          |                    |                     |
| Basic model                            | -                                  | -0.04 (-0.13;0.04)       | -0.04 (-0.11;0.02) | -0.12 (-0.16;-0.07) |
| Fully adjusted model                   | -                                  | -0.03 (-0.11;0.05)       | -0.05 (-0.11;0.02) | -0.09 (-0.14;-0.04) |

Data are regression coefficients (95% confidence interval).

Basic model was adjusted for age at baseline, follow-up time, sex, and baseline levels of respective risk factor.

Fully adjusted model was additionally adjusted for baseline leisure time exercise, occupational physical activity, smoking status, educational status, alcohol consumption, coffee intake, total energy intake, fruit intake, vegetable intake, intake of trans fat, and fibre intake.

**Table S2.** Seasonal frequency of bicycling to work at baseline and cardiovascular risk factor levels at follow-up.

|                                        | Never     | During 1 season    | During 2 seasons   | During 3 seasons     | All seasons         | P trend |
|----------------------------------------|-----------|--------------------|--------------------|----------------------|---------------------|---------|
| <b>Risk factor levels at follow-up</b> |           |                    |                    |                      |                     |         |
| BMI (kg/m <sup>2</sup> )               | Reference | -0.06 (-0.17;0.06) | -0.08 (-0.20;0.03) | -0.13 (-0.23;-0.04)  | -0.26 (-0.37;-0.16) | <0.001  |
| Systolic blood pressure (mmHg)         | Reference | -0.43 (-1.20;0.34) | -0.25 (-1.01;0.50) | -0.55 (-1.18;0.08)   | -1.46 (-2.17;-0.76) | <0.001  |
| Diastolic blood pressure (mmHg)        | Reference | -0.41 (-0.88;0.06) | -0.35 (-0.82;0.11) | -0.67 (-1.06;-0.29)  | -0.93(-1.36;-0.50)  | <0.001  |
| Triglycerides (mmol/l)                 | Reference | -0.01 (-0.05;0.02) | 0.01 (-0.02;0.04)  | -0.03 (-0.06;-0.001) | -0.05 (-0.09;-0.02) | 0.001   |
| 2-hour glucose (mmol/l)                | Reference | 0.02 (-0.05;0.10)  | -0.06 (-0.14;0.01) | -0.07 (-0.13;-0.01)  | -0.12 (-0.19;-0.05) | <0.001  |

Data are regression coefficients (95% confidence interval). All analyses were adjusted for age at baseline, follow-up time, baseline levels of risk factor, sex, leisure time exercise, occupational physical activity, smoking status, educational status, alcohol consumption, coffee intake, total energy intake, fruit intake, vegetable intake, intake of trans fat, and fibre intake.

**Table S3.** Change in commuting mode to work and cardiovascular risk factor levels at follow-up.

|                                        | N      | Remain using passive travel           | Change in commuting mode to work                        |                                |
|----------------------------------------|--------|---------------------------------------|---------------------------------------------------------|--------------------------------|
|                                        |        |                                       | Switch from passive to irregular travel mode or walking | Switch from passive to cycling |
| <b>Risk factor levels at follow-up</b> |        |                                       |                                                         |                                |
| BMI (kg/m <sup>2</sup> )               | 14,082 | Reference                             | -0.14 (-0.24 ; -0.04)                                   | -0.38 (-0.50 ; -0.25)          |
| Systolic blood pressure (mmHg)         | 14,082 | Reference                             | -0.53 (-1.25 ; 0.20)                                    | -2.01 (-2.91 ; -1.12)          |
| Diastolic blood pressure (mmHg)        | 14,082 | Reference                             | -0.65 (-1.08 ; -0.23)                                   | -0.90 (-1.42 ; -0.38)          |
| Triglycerides (mmol/l)                 | 11,791 | Reference                             | -0.01 (-0.04 ; 0.02)                                    | -0.04 (-0.08 ; -0.01)          |
| 2-hour glucose (mmol/l)                | 13,196 | Reference                             | -0.07 (-0.14 ; -0.01)                                   | -0.15 (-0.23 ; -0.07)          |
|                                        |        | Switch from cycling to passive travel | Switch from cycling to irregular travel mode or walking | Remain cycling                 |
| BMI (kg/m <sup>2</sup> )               | 4,694  | Reference                             | -0.23 (-0.41 ; -0.06)                                   | -0.38 (-0.53 ; -0.23)          |
| Systolic blood pressure (mmHg)         | 4,694  | Reference                             | 0.66 (-0.59 ; 1.92)                                     | -1.06 (-2.12 ; -0.01)          |
| Diastolic blood pressure (mmHg)        | 4,694  | Reference                             | -0.09 (-0.93 ; 0.75)                                    | -0.51 (-1.22 ; 0.20)           |
| Triglycerides (mmol/l)                 | 3,755  | Reference                             | -0.04 (-0.09 ; 0.02)                                    | -0.07 (-0.12 ; -0.02)          |
| 2-hour glucose (mmol/l)                | 4,460  | Reference                             | -0.02 (-0.15 ; 0.10)                                    | -0.16 (-0.27 ; -0.06)          |

Data are regression coefficients (95% confidence interval). All analyses were adjusted for age at baseline, follow-up time, baseline levels of risk factor, sex, baseline educational status, and baseline- and follow-up information on leisure time exercise, occupational physical activity, smoking status, alcohol consumption, coffee intake, total energy intake, intake of fruit, intake of vegetables, intake of trans fat, and fiber intake.
